# Supplementary material for: Open-cell voltage and electrical conductivity of a protonic ceramic electrolyte under two chemical potential gradients
Source: Royal Society of Chemistry journal article supplement (doi:10.1039/c8cp01880d), 2018-01-01
Supplement: c8cp01880d1.pdf [file c8cp01880d1.pdf]

## **Supporting Information**

# **Open-cell voltage and electrical conductivity of a protonic ceramic electrolyte under two chemical potential gradients**

Ho-Il Ji,<sup>1,\*</sup> Hyoungchul Kim,<sup>1</sup> Hae-Weon Lee,<sup>1</sup> Byung-Kook Kim,<sup>1</sup> Ji-Won Son,<sup>1,2</sup>

Kyung Joong Yoon,<sup>1</sup> and Jong-Ho Lee,<sup>1,2</sup>

<sup>1</sup>High-temperature Energy Materials Research Center, Korea Institute of Science and  
Technology (KIST), Seoul 02792, Republic of Korea

<sup>2</sup>Nanomaterials Science and Engineering, Korea University of Science and Technology  
(UST), KIST Campus, Seoul 02792, Republic of Korea

### Calculation of proton and oxygen vacancy mobilities

The number of oxygen sites in BZY20 is restricted to 3 in total as follows:

$$[\text{OH}_\text{o}^\bullet] + [\text{V}_\text{o}^{\bullet\bullet}] + [\text{O}_\text{o}^\times] = 3 \quad (\text{S1})$$

By combining Eq. (S1) with Eqs. (1) and (3) in the main text,  $K_\text{w}$  can be expressed as a function of proton concentration.

$$K_\text{w} = \frac{[\text{OH}_\text{o}^\bullet]^2}{a\text{H}_2\text{O} \left(3 - \frac{1}{2}[\text{Y}'_\text{Zr}] - \frac{1}{2}[\text{OH}_\text{o}^\bullet]\right) \left(\frac{1}{2}[\text{Y}'_\text{Zr}] - \frac{1}{2}[\text{OH}_\text{o}^\bullet]\right)} \quad (\text{S2})$$

The  $K_\text{w}$  for BZY20 at 500°C is reported by Yamazaki *et al.*<sup>1</sup>, and thus the proton and oxygen vacancy concentrations can be calculated at a given  $a\text{H}_2\text{O}$ .

The total electrical conductivity for BZY20 at 500°C can be obtained from the pre-factors and activation energies of the partial ionic conductivities reported by Nomura and Kageyama.<sup>2</sup> From the best fit of the general expression for the total conductivity expressed in Eq. (S3) to the actual values, the mobility of oxygen vacancies,  $u_{\text{V}_\text{o}^{\bullet\bullet}}$ , and that of protons,  $u_{\text{OH}_\text{o}^\bullet}$ , can be obtained.

$$\sigma_\text{tot} = \sigma_{\text{OH}_\text{o}^\bullet} + \sigma_{\text{V}_\text{o}^{\bullet\bullet}} = e[\text{OH}_\text{o}^\bullet]u_{\text{OH}_\text{o}^\bullet} + (2e)[\text{V}_\text{o}^{\bullet\bullet}]u_{\text{V}_\text{o}^{\bullet\bullet}} \quad (\text{S3})$$

Figure S1 shows the fit result, giving  $u_{\text{V}_\text{o}^{\bullet\bullet}} = 1.81 \times 10^{-7}$  and  $u_{\text{OH}_\text{o}^\bullet} = 2.14 \times 10^{-5}$  ( $\text{cm}^2\text{V}^{-1}\text{s}^{-1}$ ).

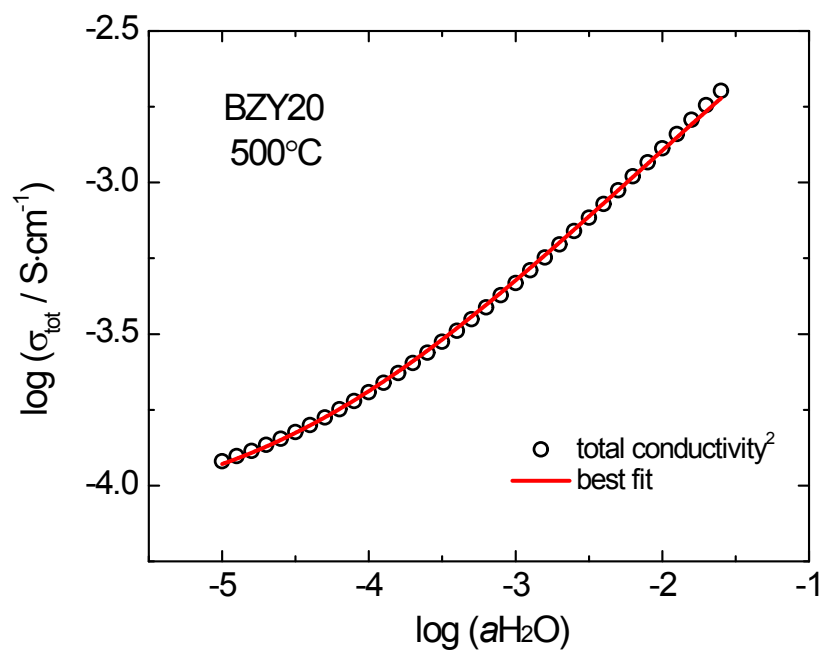

**Figure S1.** Total electrical conductivity reported by Nomura and Kageyama<sup>2</sup> and the best fit for BZY20 at 500°C.

### Calculation of $a_{O_2}$ at 500°C

To calculate  $a_{O_2}$  at fixed  $a_{H_2O}$ , the reaction for thermolysis of  $H_2O(g)$  is considered with the assumption that thermolysis is negligible at low temperature. Hereafter, subscripts  $LT$  and  $HT$  indicate low and high temperatures, respectively, and  $p\Psi$  does partial pressure of species  $\Psi$ .

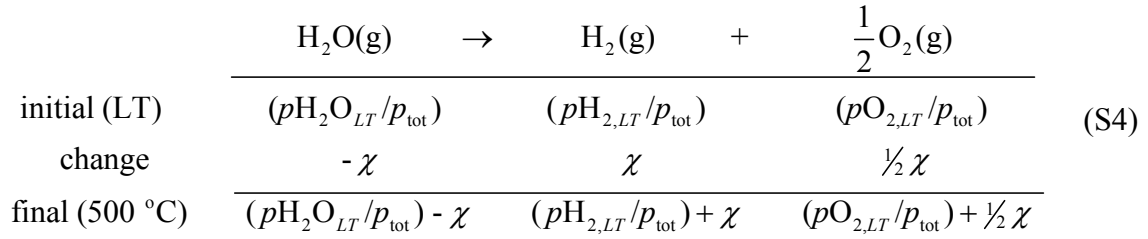

In the above,  $p_{tot}$  is total pressure considered as 1 atm at low temperature and even at 500°C after thermolysis, and  $\chi$  is the fractional concentration of  $H_2O$  consumed by thermolysis. All activity values at 500°C are expressed in Eqs. (S5-S7), and the value of  $a_{H_2O_{HT}}$  is fixed as  $A$ .

$$a_{H_2O_{HT}} = \frac{p_{H_2O_{HT}}}{p_{tot}} = \frac{(pH_2O_{LT}/p_{tot}) - \chi}{(pH_2O_{LT}/p_{tot}) + (pH_{2,LT}/p_{tot}) + (pO_{2,LT}/p_{tot}) + \frac{1}{2}\chi} = A \quad (S5)$$

$$a_{H_{2,HT}} = \frac{p_{H_{2,HT}}}{p_{tot}} = \frac{(pH_{2,LT}/p_{tot}) + \chi}{(pH_2O_{LT}/p_{tot}) + (pH_{2,LT}/p_{tot}) + (pO_{2,LT}/p_{tot}) + \frac{1}{2}\chi} \quad (S6)$$

$$a_{O_{2,HT}} = \frac{p_{O_{2,HT}}}{p_{tot}} = \frac{(pO_{2,LT}/p_{tot}) + \frac{1}{2}\chi}{(pH_2O_{LT}/p_{tot}) + (pH_{2,LT}/p_{tot}) + (pO_{2,LT}/p_{tot}) + \frac{1}{2}\chi} \quad (S7)$$

The expression for the thermodynamic equilibrium constant at 500 °C,  $K_{H_2O}$ , is given by

$$K_{H_2O}(500\text{ °C}) = \frac{p_{H_{2,HT}} \cdot (p_{O_{2,HT}})^{\frac{1}{2}}}{p_{H_2O_{HT}} \cdot (p_{tot})^{\frac{1}{2}}} \quad (S8)$$

For the anode side, since water-saturated hydrogen is normally used,  $p_{O_{2,LT}}$  can be considered to be 0, and thus,  $p_{H_2O_{LT}} + p_{H_{2,LT}} = 1$ . Overall, we have three unknown,  $\chi$ ,  $p_{H_2O_{LT}}$ , and  $p_{H_{2,LT}}$ ,

and three equations, Eqs. (S5), (S8), and  $p\text{H}_2\text{O}_{LT} + p\text{H}_{2,LT} = 1$ . Thus,  $a\text{O}_{2,HT} (= p\text{O}_{2,HT} / p_{\text{tot}})$  can be obtained by solving these simultaneous equations.

For the cathode side,  $p\text{H}_{2,LT}$  can be considered to be 0, and thus,  $p\text{O}_{2,LT} = 0.21 \times (1 - p\text{H}_2\text{O}_{LT})$ . Overall, we have three unknowns,  $x$ ,  $p\text{H}_2\text{O}_{LT}$ , and  $p\text{O}_{2,LT}$ , and three equations. Thus,  $p\text{O}_{2,HT}$  can be obtained by solving the simultaneous equations in the same way. The results of  $a\text{O}_{2,HT} (= p\text{O}_{2,HT} / p_{\text{tot}})$  for given  $a\text{H}_2\text{O}_{HT} (= p\text{H}_2\text{O}_{HT} / p_{\text{tot}})$  are summarized in Table S1.

**Table S1.** Thermodynamic calculation of  $a\text{O}_2$  at 500 °C

| Anode                           |                                          | Cathode                         |                                          |
|---------------------------------|------------------------------------------|---------------------------------|------------------------------------------|
| $a\text{H}_2\text{O}$ at 500 °C | $a\text{O}_2$ at 500 °C<br>(calculation) | $a\text{H}_2\text{O}$ at 500 °C | $a\text{O}_2$ at 500 °C<br>(calculation) |
| $1.00 \times 10^{-5}$           | $1.98 \times 10^{-38}$                   | $1.00 \times 10^{-5}$           | $2.10 \times 10^{-1}$                    |
| $1.00 \times 10^{-4}$           | $1.98 \times 10^{-36}$                   | $1.00 \times 10^{-4}$           | $2.10 \times 10^{-1}$                    |
| $1.00 \times 10^{-3}$           | $1.98 \times 10^{-34}$                   | $1.00 \times 10^{-3}$           | $2.10 \times 10^{-1}$                    |
| $1.00 \times 10^{-2}$           | $2.02 \times 10^{-32}$                   | $1.00 \times 10^{-2}$           | $2.08 \times 10^{-1}$                    |
| $3.00 \times 10^{-2}$           | $1.89 \times 10^{-31}$                   | $3.00 \times 10^{-2}$           | $2.04 \times 10^{-1}$                    |
| $5.00 \times 10^{-2}$           | $5.48 \times 10^{-31}$                   | $5.00 \times 10^{-2}$           | $2.00 \times 10^{-1}$                    |
| $7.00 \times 10^{-2}$           | $1.12 \times 10^{-30}$                   | $7.00 \times 10^{-2}$           | $1.96 \times 10^{-1}$                    |
| $1.00 \times 10^{-1}$           | $2.44 \times 10^{-30}$                   | $1.00 \times 10^{-1}$           | $1.91 \times 10^{-1}$                    |

## References

1. Y. Yamazaki, P. Babilo and S. M. Haile, *Chem. Mat.*, 2008, **20**, 6352-6357.
2. K. Nomura and H. Kageyama, *Solid State Ionics*, 2007, **178**, 661-665.
